# Supplementary material for: Anti–SARS-CoV-2 Natural Products as Potentially Therapeutic Agents
Source: PubMed Central journal article supplement (PMC8194829; doi:10.3389/fphar.2021.590509), 2021-05-27

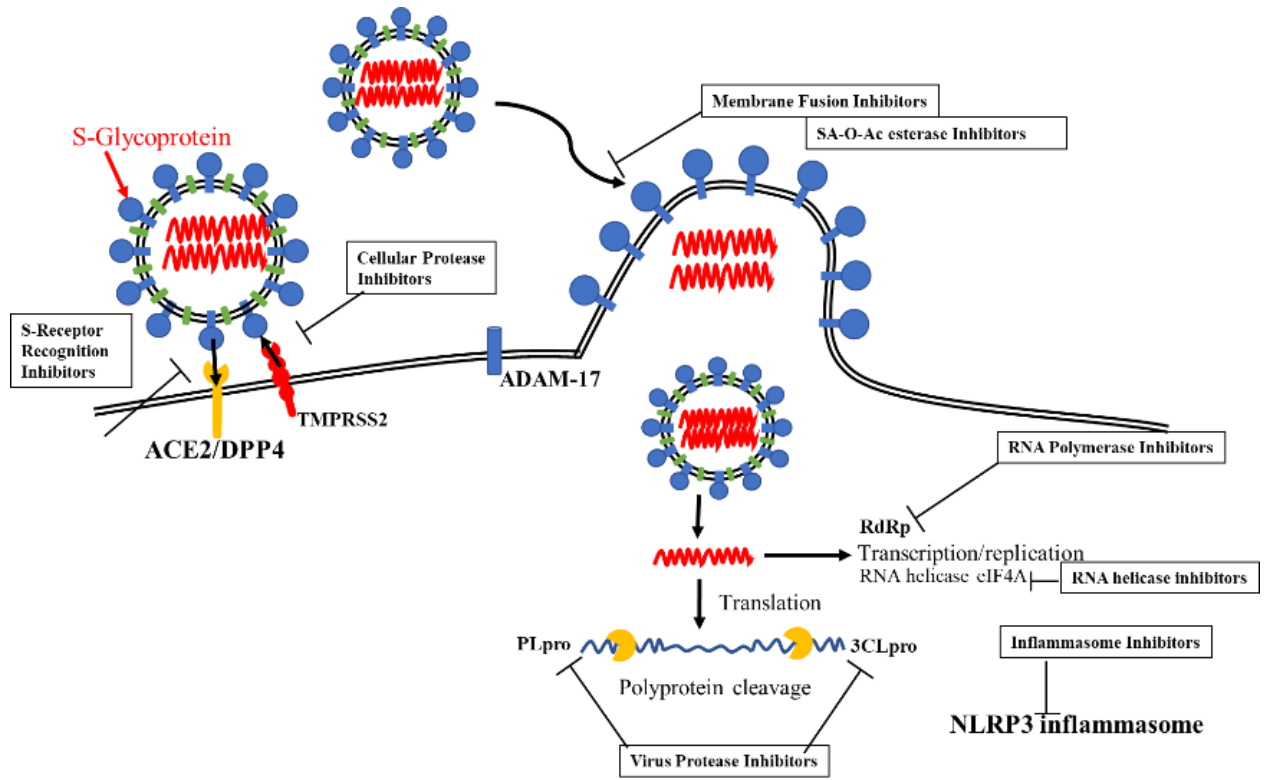

Supplement: image1.pdf [file image1.pdf]
